# Supplementary material for: The Annoying Nature of Snoring Sounds Is Not Only about Intensity: A Pilot Study on Exposed Test Subjects
Source: MDPI journal article supplement (doi:10.3390/jcm12072630), 2023-03-31
Supplement: s1 [file s1]

# Supplementary material

**Table S1.** The correlation between the order of snoring epoch and listeners' perceived annoyance

| Correlations   |       |                         | score | order |
|----------------|-------|-------------------------|-------|-------|
| Spearman's rho | score | Correlation Coefficient | 1.000 | 0.486 |
|                |       | Sig. (2-tailed)         |       | 0.329 |
|                | N     |                         | 6     | 6     |
|                | order | Correlation Coefficient | 0.486 | 1.000 |
|                |       | Sig. (2-tailed)         | 0.329 |       |
|                | N     |                         | 6     | 6     |
